# Supplementary material for: A Silver Monochrome “Concetto spaziale” by Lucio Fontana: A Spectroscopic Non- and Micro-Invasive Investigation of Materials
Source: MDPI journal article supplement (doi:10.3390/molecules27144442), 2022-07-11
Supplement: s1 [file s1]

## Supplementary Materials

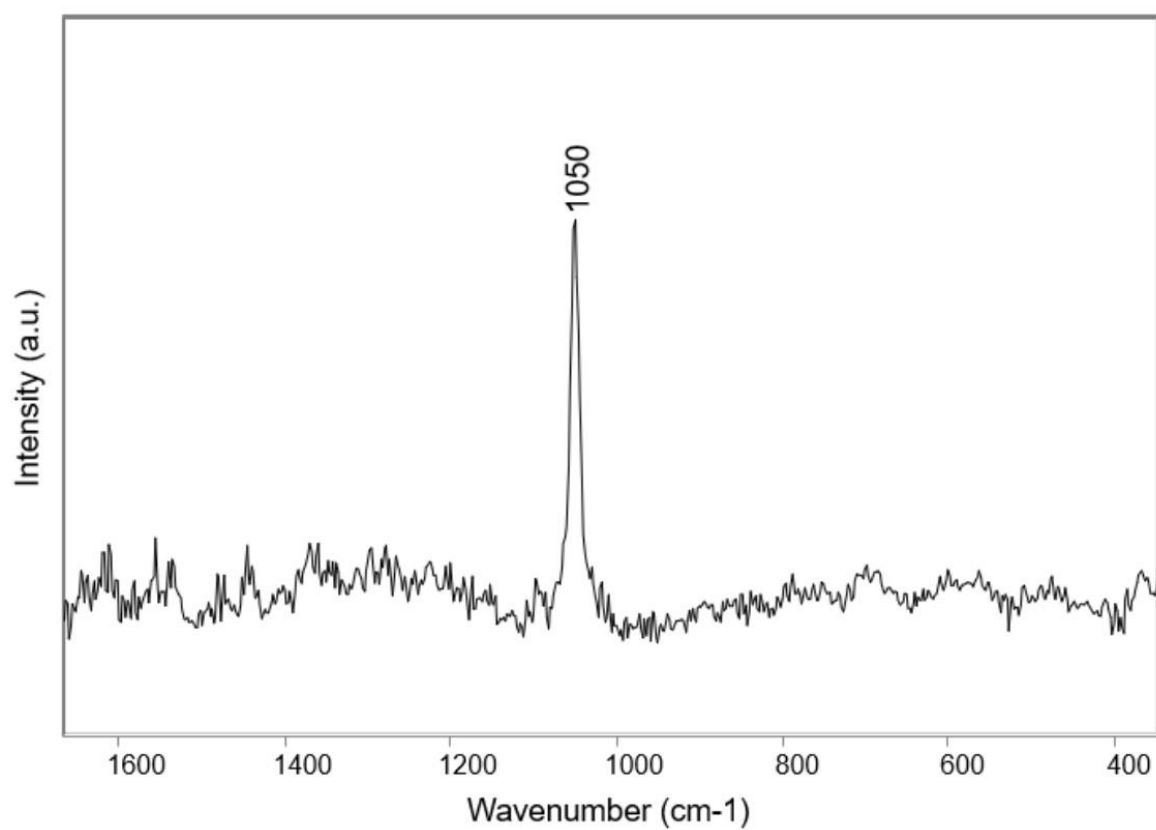

**Figure S1.** FT-Raman spectrum of the silver paint on the micro-sample taken from the dripping on the back of the “Concetto spaziale” near the cut.

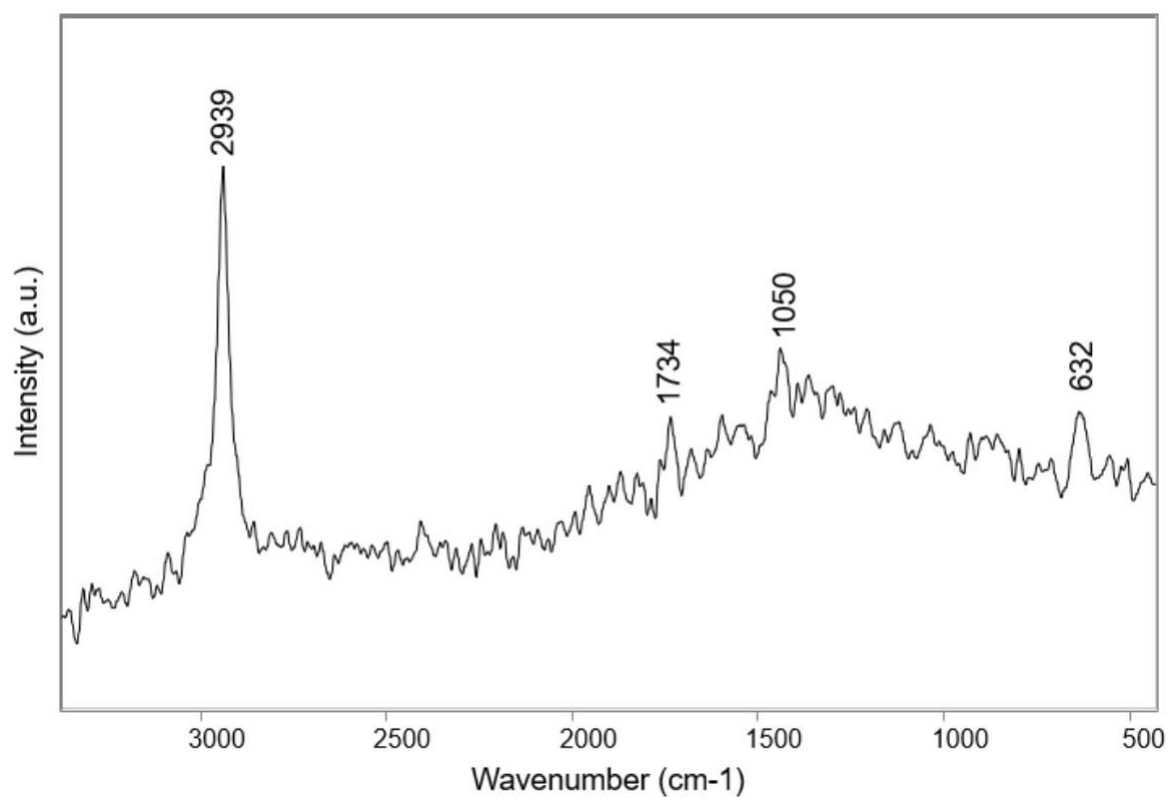

**Figure S2.** Raman spectrum obtained on the back of the canvas of the “Concetto spaziale” by Lucio Fontana.
